# Supplementary material
Source: PubMed Central journal article supplement (PMC3726166)
Supplement: JCI68049sd.pdf [file JCI68049sd.pdf]

## Supplemental Methods

### Generation of *Osx1-Cre*, *FoxO3<sup>fl/fl</sup>* mice

To delete *FoxO3* from *Osx1*-expressing cells, *Osx1-Cre* transgenic mice (mixed background crossed into C57BL/6 for more than 9 generations) were crossed with *FoxO3<sup>fl/fl</sup>* mice (FVBn), a gift from Ronald DePinho (University of Texas, MD Anderson Cancer Center, Houston, Texas) (1), to generate mice that were heterozygous for floxed *FoxO3* allele with and without the *Osx1-Cre* transgene. These mice were intercrossed to generate the experimental wild-type, *Osx1-Cre*, *FoxO3<sup>fl/fl</sup>* and *FoxO3<sup>fl/fl</sup>;Osx1-Cre* mice.

### Micro-CT

Micro-CT analysis was done after the bones were dissected, cleaned, fixed in 10% Millonig's formalin and transferred to 100% ethanol, loaded into 10 mm diameter scanning tubes and imaged ( $\mu$ CT40, Scanco Medical) and the vertebral and femoral cancellous bone was analyzed as previously described (2). At medium resolution (nominal isotropic voxel size = 12  $\mu$ m), 550 slices were acquired and 400 were used for analysis. Scans were integrated into 3-D voxel images (1024 x 1024 pixel matrices for each individual planar stack). A Gaussian filter (sigma = 0.8, support = 1) was applied to all analyzed scans. Key parameters were x-ray tube potential = 55 kVp, x-ray intensity = 145  $\mu$ A, integration time = 200 ms, and threshold = 200 mg/cm<sup>3</sup>. Image processing language scripts including the "cl\_image" command were used to obtain the femoral endocortical and periosteal circumference. Micro-CT measurements were expressed in 3-D nomenclature. After a 1-hour warm-up period, calibration and quality control was done weekly using five density standards and spatial resolution was verified monthly using a tungsten wire rod. Beam-hardening correction was based on the calibration records. Corrections were made for 200 mg/cm<sup>3</sup> hydroxyapatite for all energies. Over the past 3 years, the coefficient of variation for the fifth density standard (mean five) was 0.97% ( $787 \pm 7.6$  SD mg HA/cm<sup>3</sup>) and for rod volume was 2.18% ( $0.0642 \pm 0.0014$  SD cm<sup>3</sup>).

### Quantitative RT-PCR

Taqman quantitative PCR was performed to determine mRNA levels using the primers Mm00490672\_m1 (*FoxO1*); Mm00490673\_m1 (*FoxO3*); Mm00840140\_g1 (*FoxO4*);

Mm00432359\_m1 (Cnd1); Mm00475831\_m1 (ALP); Mm00501578\_m1 (Runx2); Mm00801666\_g1 (Col1a1); Mm00435452\_m1 (OPG); Mm00470479\_m1 (Sost); Mm00439105\_m1 (Cnx43); Mm01210646\_m1(Mmp16); Mm00487160\_m1 (Col6a1); Mm00440945\_m (Ppar $\gamma$ 2); Mm01350394\_m1 ( $\beta$ -catenin) and Mm00475528\_m1 (ribosomal protein S2) manufactured by the TaqMan<sup>®</sup> Gene Expression Assays service (Applied Biosystems). Osterix, osteocalcin FABP4 and DKK1 levels were determined using custom made Taqman Assay by Design primer sets 5'ATCTGACTTTGCTCCCCTTAACC3' and 5'GGGCCCTGGTTGCAAGA3'; 5'GCTGCGCTCTGTCTCTCTGA3' and 5'TGCTTGGACATGAAGGCTTTG3'; 5'GCGTGGAATTCGATGAAATCA3' and 5'GGGCCCCGCCATCTAG3'; 5' GGGCTGTGTTGTGCAAGACA3' and 5'GGTGCACACCTGACCTTCTTTAA3', respectively.

### Supplemental References

1. Paik JH et al. FoxOs are lineage-restricted redundant tumor suppressors and regulate endothelial cell homeostasis. *Cell*. 2007;128:309-323.
2. Jilka R.L. et al. Decreased oxidative stress and greater bone anabolism in the aged, as compared to the young, murine skeleton by parathyroid hormone. *Aging Cell*. 2010;9:851-867.

## Supplemental Table 1

Effects of FoxO deletion in Osx1-Cre expressing cells in growing mice. Micro-CT measurements in the vertebrae and femurs at four (n=8/group) and seven weeks of age (n=9-11/group). BV/TV, bone volume per tissue volume; Tb, trabecular. Values represent mean s.d., \*p<0.05 versus respective FoxO1,3,4<sup>ff</sup> by Student's t-test.

|          |                                  | <u>4 weeks</u>          |       |                                       |        | <u>7 weeks</u>                        |  |               |  |
|----------|----------------------------------|-------------------------|-------|---------------------------------------|--------|---------------------------------------|--|---------------|--|
|          |                                  | FoxO1,3,4 <sup>ff</sup> |       | FoxO1,3,4 <sup>ff</sup> ;<br>Osx1-Cre |        | FoxO1,3,4 <sup>ff</sup> ;<br>Osx1-Cre |  |               |  |
| Vertebra | BV/TV (%)                        | 27.0 ± 4.5              |       | 29.7 ± 2.7                            |        | 30.8 ± 3.5                            |  | 35.1 ± 6.2    |  |
|          | Connectivity (/mm <sup>3</sup> ) | 306.0 ± 49.8            |       | 304.9 ± 40.2                          |        | 159.0 ± 15.6                          |  | 173.0 ± 25.6  |  |
|          | Tb. Number (/mm)                 | 5.4 ± 0.82              |       | 5.0 ± 0.23                            |        | 4.4 ± 0.34                            |  | 4.6 ± 0.31    |  |
|          | Tb. Thickness (mm)               | 0.05 ± 0.010            |       | 0.05 ± 0.002                          |        | 0.07 ± 0.005                          |  | 0.07 ± 0.008  |  |
|          | Tb. Spacing (mm)                 | 0.18 ± 0.023            |       | 0.20 ± 0.007                          |        | 0.23 ± 0.019                          |  | 0.22 ± 0.018  |  |
| Femur    | BV/TV (%)                        | 23.97                   | 6.8   | 45.43                                 | 7.1*   | 23.85 ± 5.6                           |  | 36.78 ± 8.8*  |  |
|          | Connectivity (/mm <sup>3</sup> ) | 247.4                   | 89.6  | 322.2                                 | 36.5   | 180.9 ± 40.1                          |  | 248.1 ± 36.5* |  |
|          | Tb. Number (/mm)                 | 4.9                     | 1.18  | 7.8                                   | 0.82*  | 4.9 ± 0.64                            |  | 6.5 ± 0.88*   |  |
|          | Tb. Thickness (mm)               | 0.06                    | 0.002 | 0.07                                  | 0.006* | 0.07 ± 0.005                          |  | 0.08 ± 0.011* |  |
|          | Tb. Spacing (mm)                 | 0.22                    | 0.072 | 0.12                                  | 0.021* | 0.21 ± 0.031                          |  | 0.15 ± 0.024* |  |
|          | Cortical Thickness (mm)          | 0.18 ± 0.02             |       | 0.19 0.01                             |        | 0.21 ± 0.012                          |  | 0.23 ± 0.013* |  |

## Supplemental Table 2

Changes in antioxidant gene expression resulting from FoxO deletion in *Osx1*-GFP calvaria cells by microarray

| Gene symbol  | Gene name                         | Average Intensity |                                          | Ratio<br>(FoxO1,3,4 <sup>fl/fl</sup> ;<br>Osx1-Cre/<br>Osx1-Cre) |
|--------------|-----------------------------------|-------------------|------------------------------------------|------------------------------------------------------------------|
|              |                                   | Osx1-Cre          | FoxO1,3,4 <sup>fl/fl</sup> ;<br>Osx1-Cre |                                                                  |
| <b>CAT</b>   | Catalase                          | 355.92            | 284.71                                   | 0.80                                                             |
| <b>Gsta4</b> | Glutathione-S-transferase alpha 4 | 171.04            | 762.35                                   | 4.46*                                                            |
| <b>SOD1</b>  | Superoxide dismutase 1            | 3665.78           | 2930.62                                  | 0.80                                                             |
| <b>SOD2</b>  | Superoxide dismutase 2            | 2319.08           | 1653.88                                  | 0.71                                                             |
| <b>SOD3</b>  | Superoxide dismutase 3            | 298.86            | 240.97                                   | 0.81                                                             |
| <b>PRDX1</b> | Peroxiredoxin 1                   | 10932.28          | 8827.29                                  | 0.81                                                             |
| <b>PRDX2</b> | Peroxiredoxin 2                   | 7928.59           | 7709.44                                  | 0.97                                                             |
| <b>PRDX3</b> | Peroxiredoxin 3                   | 897.78            | 653.21                                   | 0.73                                                             |
| <b>PRDX4</b> | Peroxiredoxin 4                   | 4395.18           | 3889.81                                  | 0.89                                                             |
| <b>PRDX5</b> | Peroxiredoxin 5                   | 3894.06           | 2401.34                                  | 0.62                                                             |
| <b>PRDX6</b> | Peroxiredoxin 6                   | 92.18             | 83.25                                    | 0.90                                                             |
| <b>SESN1</b> | Sestrin1                          | 167.67            | 214.26                                   | 0.78                                                             |
| <b>SESN2</b> | Sestrin 2                         | 119.30            | 122.33                                   | 0.98                                                             |
| <b>SESN3</b> | Sestrin 3                         | 66.54             | 85.55                                    | 0.78                                                             |

\* $p \leq 0.0001$ ; shown in red are previously described FoxO-target genes

### Supplemental Table 3

Changes in gene expression resulting from FoxO deletion in Osx1-GFP calvaria cells by microarray

| Gene symbol | Gene name                                    | Average Intensity |                                       | Ratio<br>(FoxO1,3,4 <sup>ff</sup> ;<br>Osx1-Cre/<br>Osx1-Cre) |
|-------------|----------------------------------------------|-------------------|---------------------------------------|---------------------------------------------------------------|
|             |                                              | Osx1-Cre          | FoxO1,3,4 <sup>ff</sup> ;<br>Osx1-Cre |                                                               |
| Rankl       | Receptor activator of NFκB ligand            | 85.91             | 90.31                                 | 1.05                                                          |
| M-csf       | Colony stimulating factor 1 (macrophage)     | 4043.10           | 2724.91                               | 0.67                                                          |
| Alpl        | Alkaline phosphatase, liver/bone/kidney      | 88.38             | 83.74                                 | 0.95                                                          |
| Runx2       | Runt-related transcription factor 2          | 65.63             | 62.46                                 | 0.95                                                          |
| Osx1        | Sp7 transcription factor 7                   | 567.21            | 315.44                                | 0.56                                                          |
| Col1a1      | Collagen, type 1, alpha1                     | 5168.77           | 4607.22                               | 0.89                                                          |
| Dkk1        | Dickkopf homolog 1 ( <i>Xenopus laevis</i> ) | 57.83             | 55.81                                 | 0.96                                                          |
| Sost        | Sclerostin                                   | 54.28             | 50.83                                 | 0.94                                                          |
| Sfrp1       | Secreted frizzled related protein 1          | 340.87            | 618.44                                | 1.81*                                                         |
| Sfrp2       | Secreted frizzled related protein 2          | 76.31             | 87.11                                 | 1.14                                                          |
| WNT1        | Wingless-related MMTV integration site 1     | 56.17             | 50.74                                 | 0.9                                                           |
| WNT2        | Wingless-related MMTV integration site 2     | 136.65            | 115.74                                | 0.85                                                          |
| WNT2B       | Wingless-related MMTV integration site 2B    | 60.16             | 58.44                                 | 0.97                                                          |
| WNT3        | Wingless-related MMTV integration site 3     | 61.72             | 53.56                                 | 0.87                                                          |
| WNT3A       | Wingless-related MMTV integration site 3B    | 56.83             | 57.19                                 | 1.01                                                          |
| WNT4        | Wingless-related MMTV integration site 4     | 80.48             | 72.58                                 | 0.9                                                           |
| WNT5A       | Wingless-related MMTV integration site 5A    | 1021.69           | 395.54                                | 0.39*                                                         |
| WNT5B       | Wingless-related MMTV integration site 5B    | 108.44            | 111.77                                | 1.03                                                          |
| WNT6        | Wingless-related MMTV integration site 6     | 54.42             | 51.13                                 | 0.94                                                          |
| WNT7A       | Wingless-related MMTV integration site 7A    | 52.33             | 52.22                                 | 1                                                             |
| WNT7B       | Wingless-related MMTV integration site 7B    | 56.92             | 57.5                                  | 1.01                                                          |
| WNT8A       | Wingless-related MMTV integration site 8A    | 52.84             | 51.74                                 | 0.98                                                          |
| WNT8B       | Wingless-related MMTV integration site 8B    | 53.06             | 55.66                                 | 1.05                                                          |
| WNT9A       | Wingless-related MMTV integration site 9A    | 63.08             | 62.94                                 | 1                                                             |
| WNT9B       | Wingless-related MMTV integration site 9B    | 57.52             | 56.19                                 | 0.98                                                          |
| WNT10A      | Wingless-related MMTV integration site 10A   | 69.9              | 68.8                                  | 0.98                                                          |
| WNT10B      | Wingless-related MMTV integration site 10B   | 75.55             | 57.89                                 | 0.77                                                          |
| WNT11       | Wingless-related MMTV integration site 11    | 59.79             | 57.33                                 | 0.96                                                          |
| WNT16       | Wingless-related MMTV integration site 16    | 55.98             | 53.79                                 | 0.96                                                          |

\*p ≤ 0.005

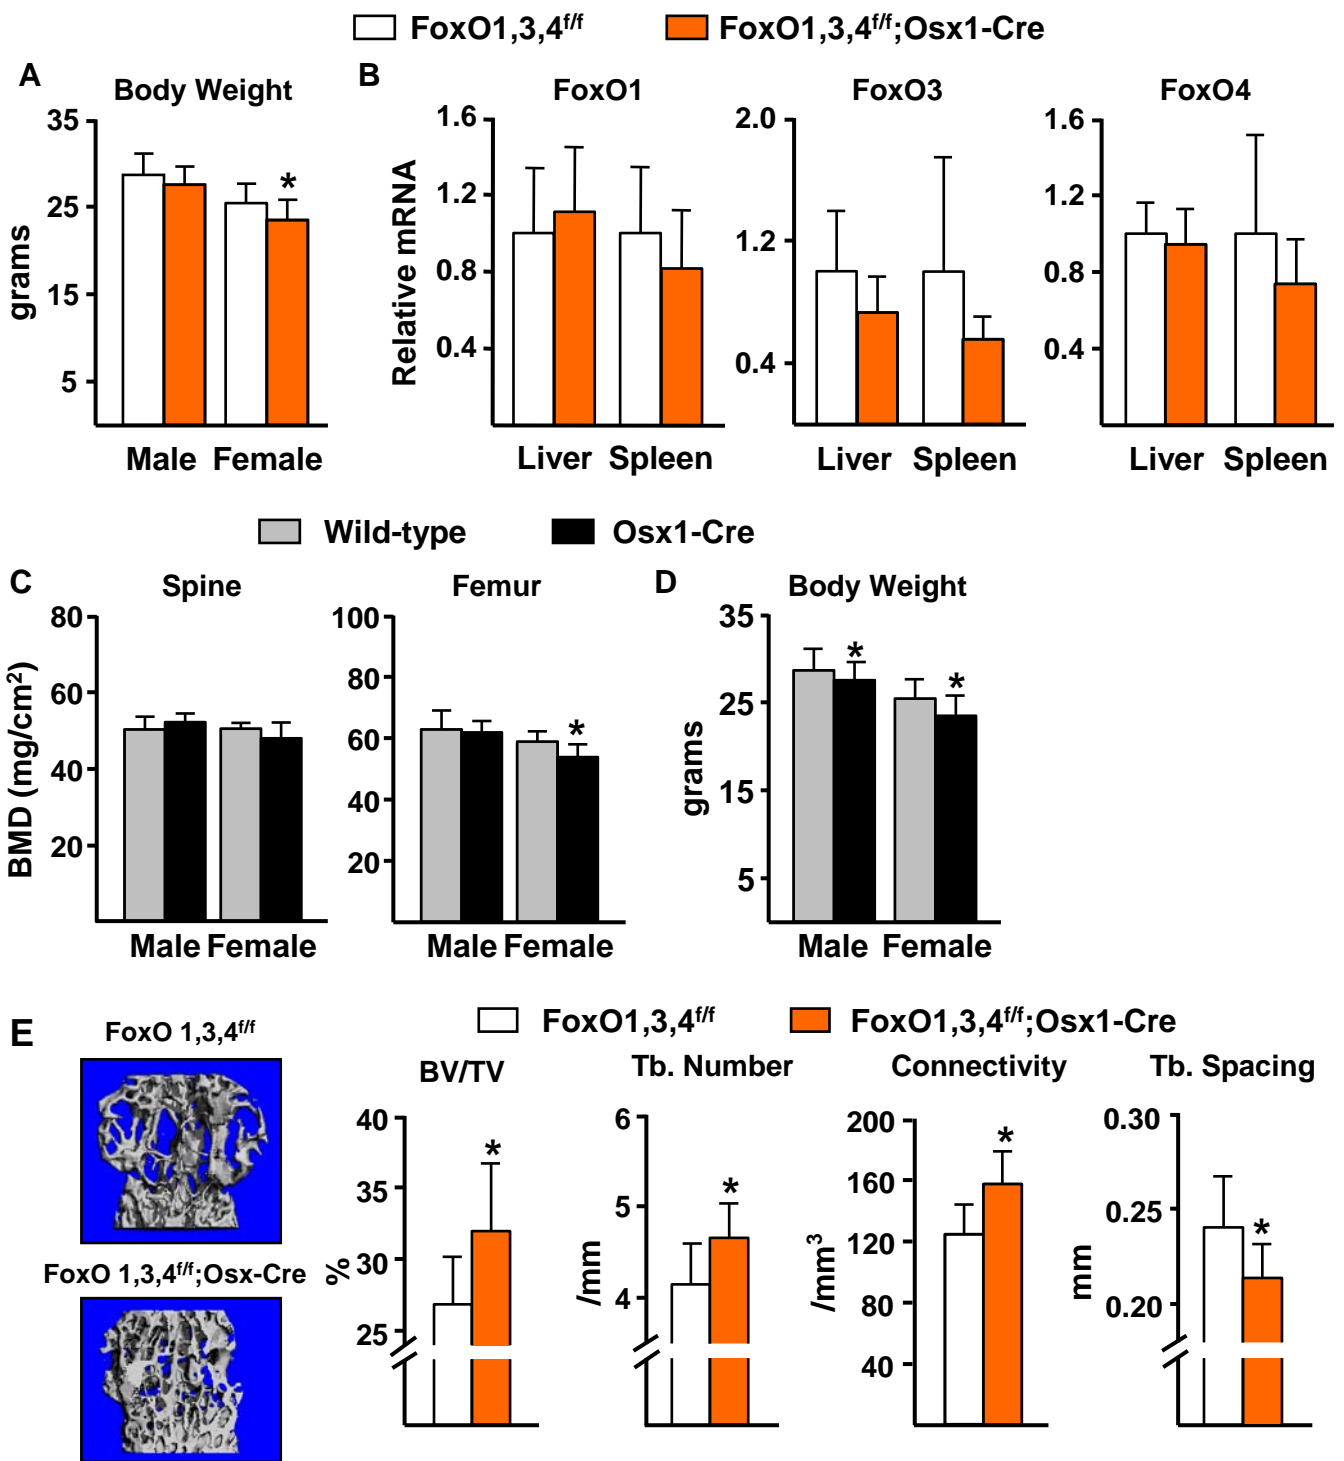

**Supplemental Figure 1**

**Mice with FoxO1, 3 and 4 deletion in osteoprogenitors have high bone mass.** (A) Body weights of 3 month old male (n=15-20/group) and female mice (n=23-30/group). (B) mRNA levels by quantitative RT-PCR in liver and spleen of 3 month old mice (n=8-10/group). (C) DEXA BMDs and (D) body weights of 3 months old mice (n=7-10/group). (E) Micro-CT measurements in the vertebra (L5) of 3 month old male mice. Representative images of vertebral cancellous bone are shown. BV/TV, bone volume per tissue volume; Tb, trabecular. Bars represent mean and s.d., \*p<0.05 versus FoxO1,3,4<sup>ff</sup> or wild-type by Student's t-test.

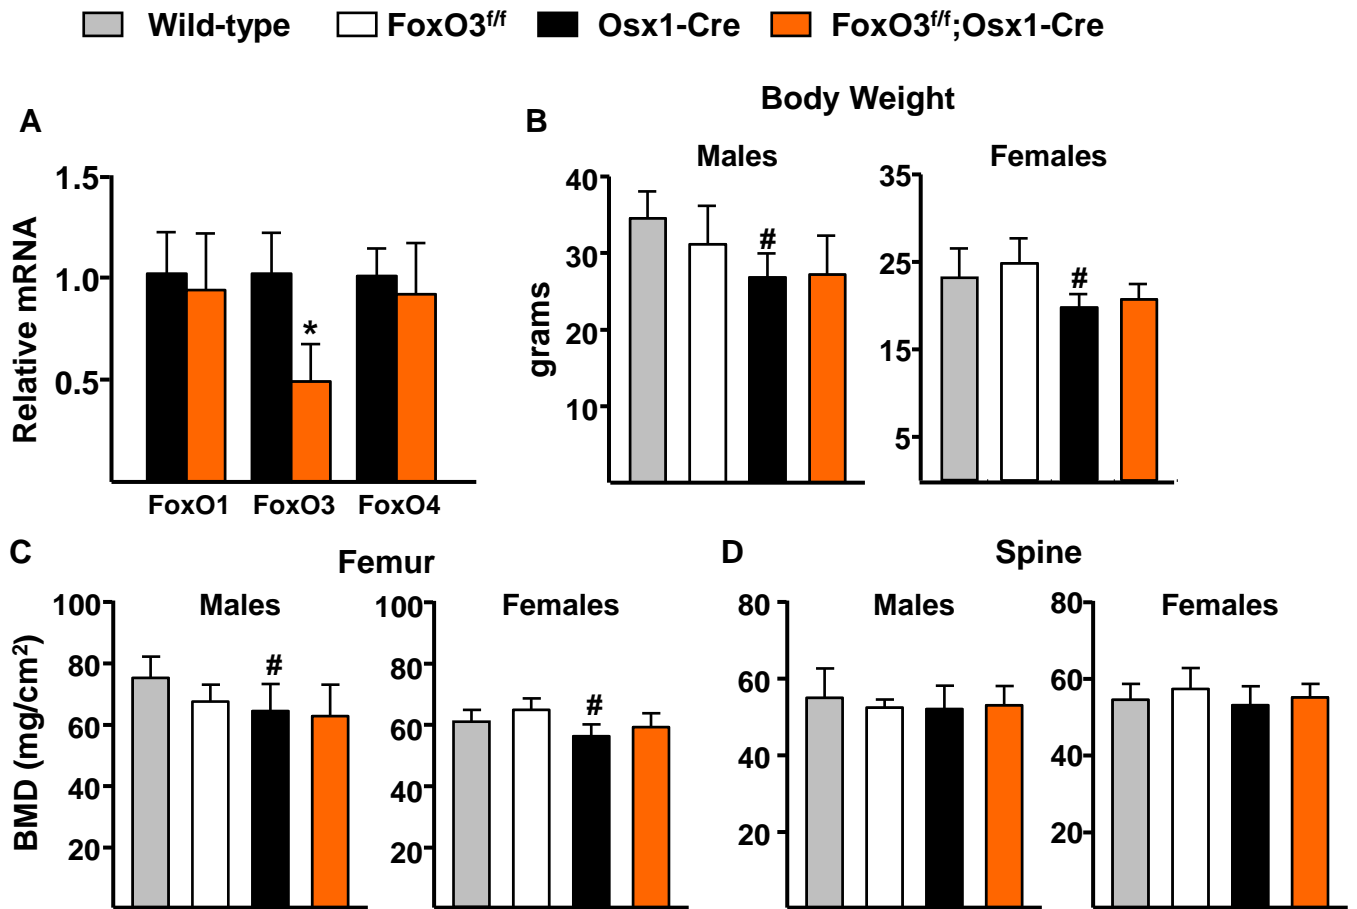

### Supplemental Figure 2

FoxO3 deletion in osteoprogenitors does not affect bone mass. (A) mRNA levels determined by qRT-PCR in high density bone marrow stromal cells (triplicates) cultured with 1% ascorbate for 21 days. (B) Body weights of 3 month old male (n=7-11/group) and female (n=8-15/group) mice. (C) Femur and (D) Spine DEXA BMDs of the mice described in A. Bars represent mean and s.d., #p<0.05 versus wild-type or FoxO3<sup>ff</sup> by two-way ANOVA, \*p<0.05 versus Osx1-Cre by Student's t-test.

□ FoxO1,3,4<sup>ff</sup>      ■ FoxO1,3,4<sup>ff</sup>;Osx1-Cre

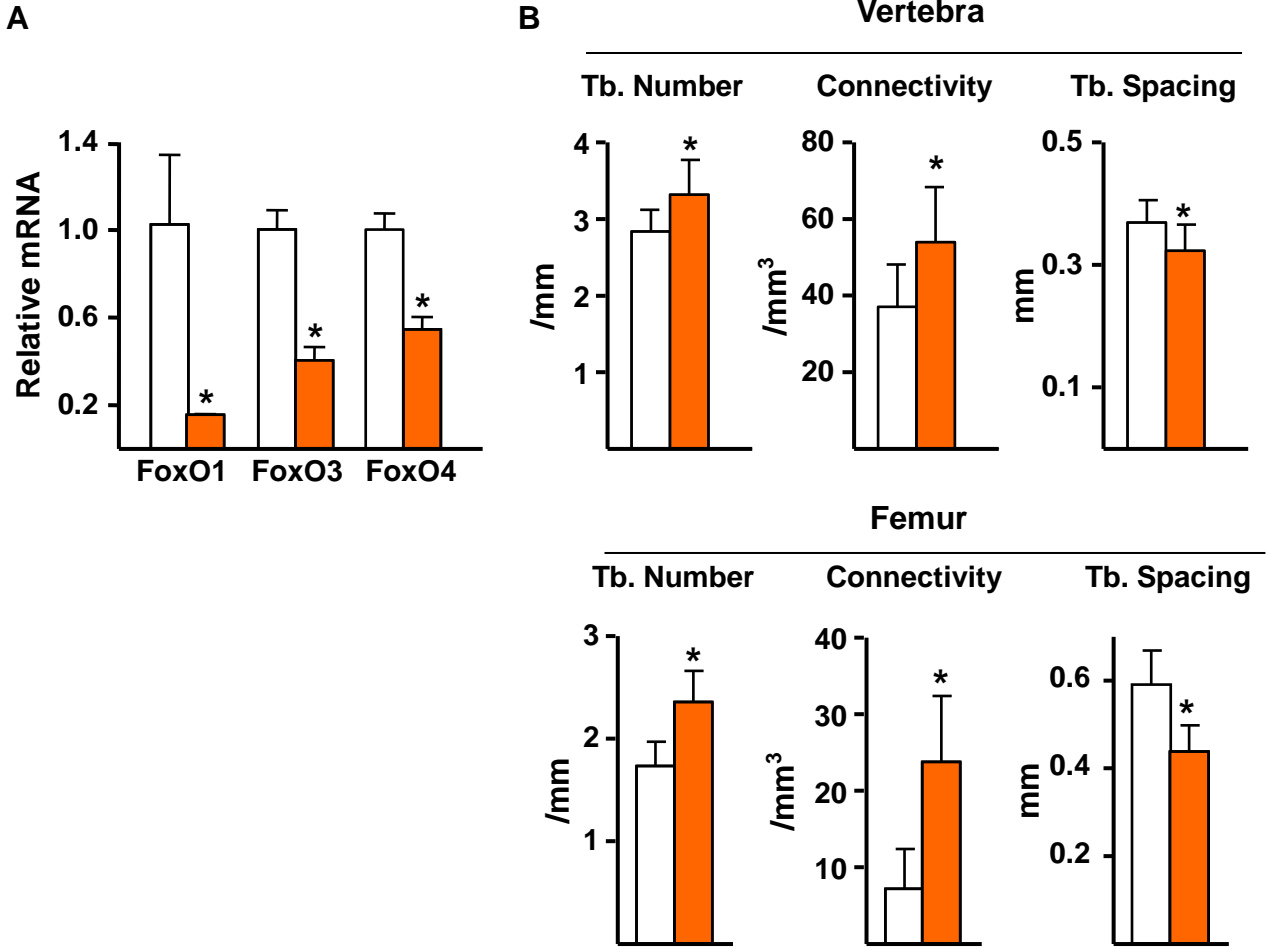

### Supplemental Figure 3

FoxO deletion in osteoprogenitor cells of adult mice increases bone mass. **(A)** FoxO deletion was induced in 3 month old females by replacing the doxycycline containing diet with regular chow. FoxO mRNA levels were determined by quantitative RT-PCR in cultured bone marrow stromal cells obtained after euthanasia at 7.5 months of age (triplicates). **(B)** Micro-CT measurements in vertebra (L5) and femur of the mice described in A (n=10-11/group). BV/TV, bone volume per tissue volume, Tb, trabecular. Bars represent mean and s.d.\*p<0.05 versus FoxO1,3,4<sup>ff</sup> by Student's t-test.



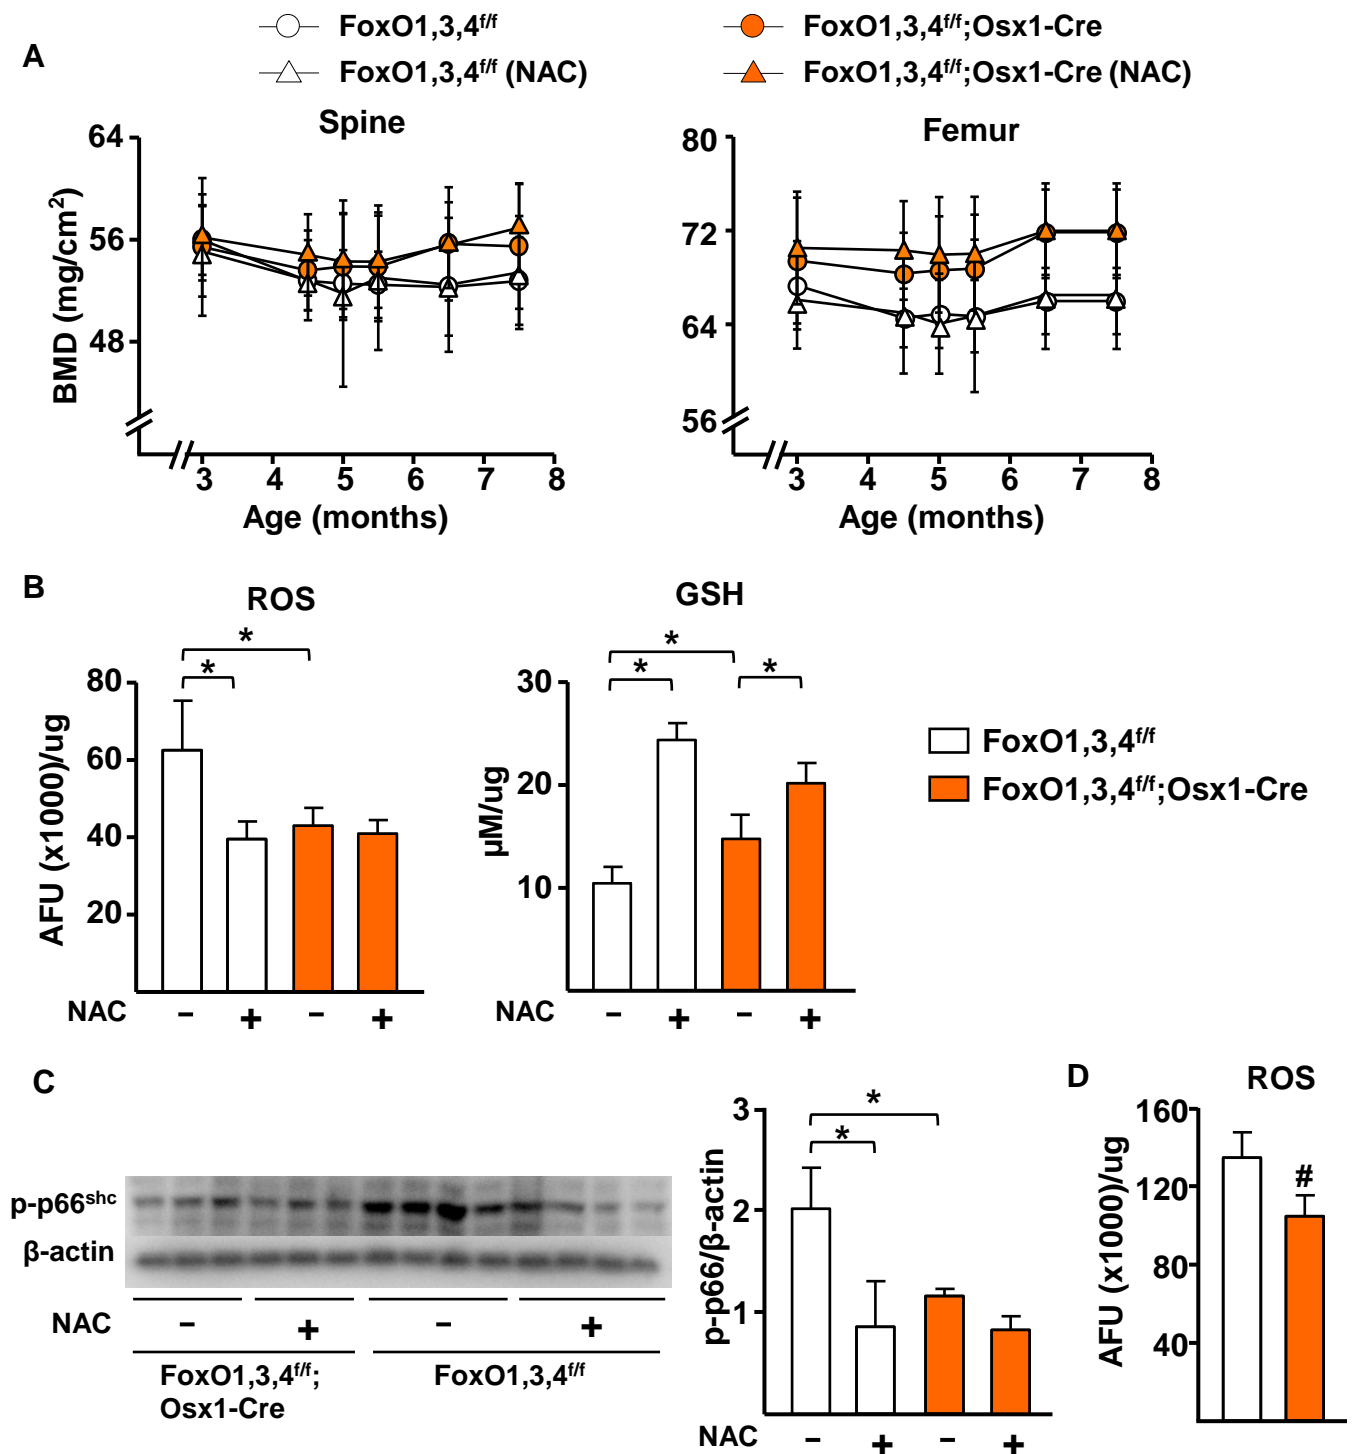

**Supplemental Figure 4**

Administration of the anti-oxidant NAC to FoxO1,3,4<sup>ff</sup>;Osx1-Cre mice had no effect on bone mass. (A-D) FoxO deletion was induced in 3 month old females by replacing the doxycycline containing diet with regular chow or a diet containing 100 mg kg<sup>-1</sup> N-acetyl-cysteine (NAC). (A) Longitudinal BMD measurements determined by DXA (n=10-11/group). Data represents mean and s.d. (B) ROS and GSH levels in the bone marrow. (C) phospho-p66<sup>shc</sup> by Western blot in vertebral bone lysates. Each lane represents one animal; the quantification is shown on the right. (D) ROS levels in the bone marrow of 24 month old females. Bars represent mean and s.d. \*p<0.05 by two-way ANOVA; #p<0.05 by Students t test.

□ FoxO1,3,4<sup>ff</sup>    ■ FoxO1,3,4<sup>ff</sup>;Osx1-Cre

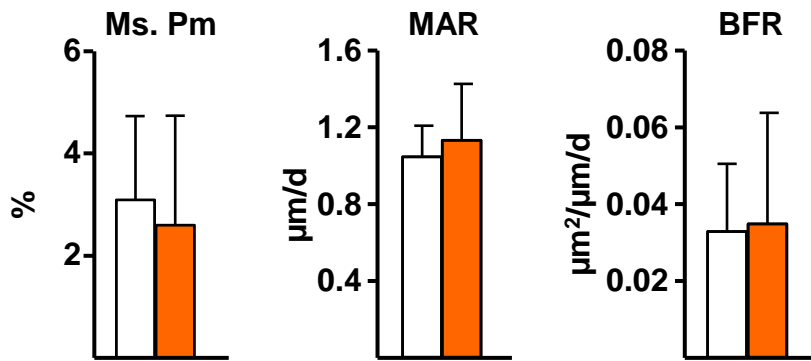

### Supplemental Figure 5

Bone formation in aged FoxO1,3,4<sup>ff</sup>;Osx1-Cre mice. Mineralizing surface (MS), mineral apposition rate (MAR), and bone formation rate (BFR) as determined by tetracycline labels, in the cancellous bone of longitudinal undecalcified vertebral (L1-L3) sections from 24 month old female mice (n=6-7/group). Bone sections in three FoxO1,3,4<sup>ff</sup> and two FoxO1,3,4<sup>ff</sup>;Osx1-Cre mice had less than five double labels, the minimum recommended by the ASBMR Histomorphometry Nomenclature Committee (Dempster et al. *J Bone Miner Res.* 2013, 28:1-16; Recker et al. *Bone* 2011, 49:955-964). Bars represent mean and s.d.

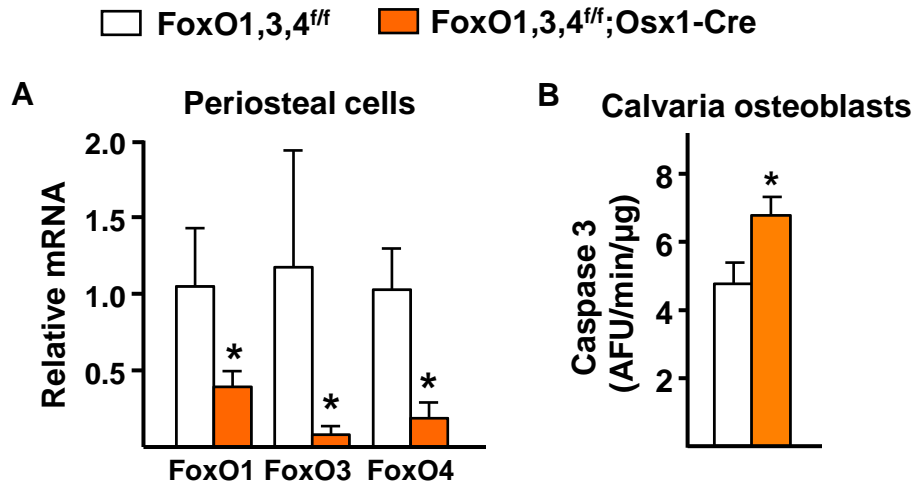

### Supplemental Figure 6

Apoptosis is increased in osteoblast cultured from FoxO1,3,4<sup>ff</sup>;Osx1-Cre mice. (A) mRNA levels of FoxOs determined by qRT-PCR in cultured periosteal cells isolated from 7-week-old mice (triplicates). (B) Caspase 3 activity in calvaria cells from 5 month-old mice cultured for 10 days in the presence of ascorbic acid (triplicates). Bars represent mean and s.d.; \*p<0.05 by Student's t-test.

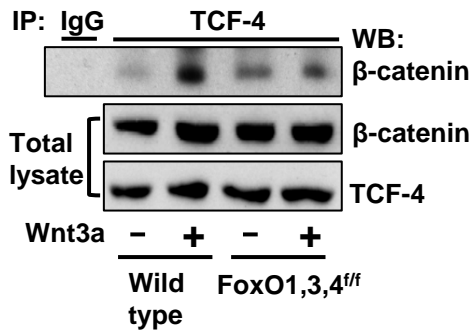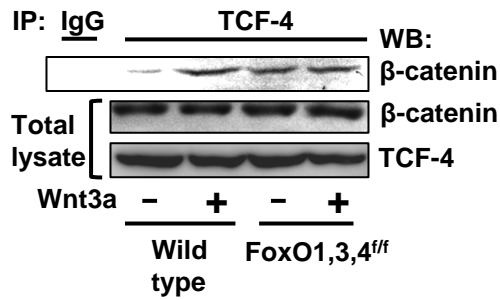

### Supplemental Figure 7

The binding of  $\beta$ -catenin to TCF4 is increased in the absence of FoxOs. Calvaria cell cultures from the indicated mice were infected with Adeno-Cre to induce FoxO deletion and treated with vehicle or 50 ng/ml Wnt3a. Total cell lysates were immunoprecipitated with an anti-TCF-4 or anti-IgG antibody and probed with an anti- $\beta$ -catenin antibody. Two independent experiments are depicted.

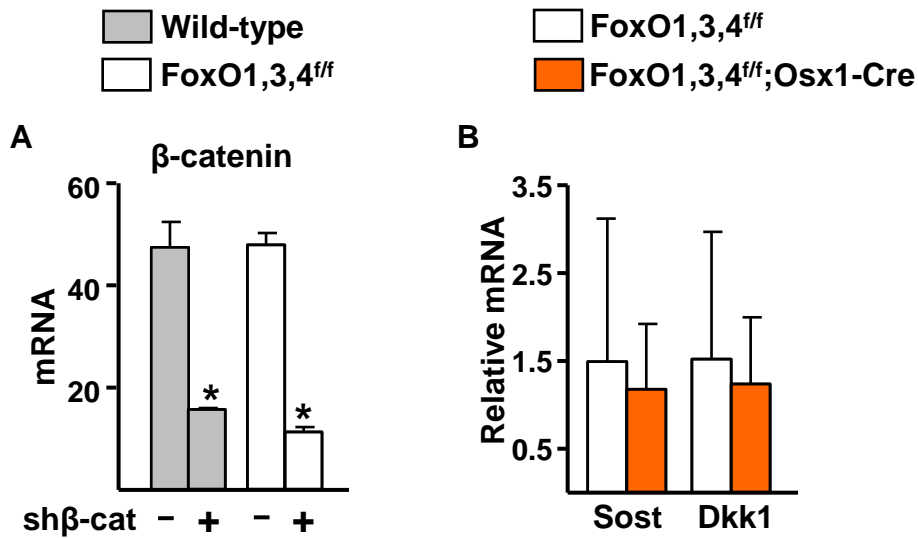

### Supplemental Figure 8

Gene expression in cells and bone from FoxO1,3,4<sup>ff</sup>;Osx1-Cre mice. **(A)** mRNA levels determined by quantitative(q) RT-PCR in calvaria-derived cells infected with Adeno-Cre and with empty viral particles (-) shRNA or one clone expressing shRNA directed against  $\beta$ -catenin (triplicates). **(B)** mRNA levels determined by qRT-PCR in bone shafts from 3 month old mice (n=8-9/group). Bars represent mean and s.d.; \*p<0.05 versus respective cells infected with empty viral particles by Student's t-test.
